# Supplementary material for: Frequency of off-targeting in genome edited pigs produced via direct injection of the CRISPR/Cas9 system into developing embryos
Source: PubMed Central journal article supplement (PMC6501304; doi:10.1186/s12896-019-0517-7), 2019-05-06
Supplement: 12896_2019_517_MOESM1_ESM.pdf [file 12896_2019_517_MOESM1_ESM.pdf]

## Supplementary Tables

Supplementary Table 1. Summary of off-targeting comparison for *RAG2*. Target gene (*RAG2*) guide sequence compared to potential off-target sequence. Location on chromosome, intron or exon region and presence of PAM site is indicated.

| Gene                | Sequence             | Location on chromosome            | Intron/Exon? | PAM |
|---------------------|----------------------|-----------------------------------|--------------|-----|
| <i>RAG2</i>         | GTATAGTCGAGGGAAAAGTA | NC_010444.4 (24547605-24553944)   | Exon         | Yes |
| <i>SLC04C1</i>      | GTATAGTTGAGGGAAAATAA | NC_010444.3 (111923785-111924901) | Intron       | No  |
| <i>PLCXD3</i>       | GTATAGTCAAGGAAAAGTA  | NC_010458.3 (27465590-27466609)   | Intron       | No  |
| <i>FAM174B</i>      | GTATAGTCGAGGGAAACCTC | NC_010449.4 (92221611-92222625)   | Intron       | No  |
| <i>DPYD</i>         | ATATAGTAGAGGGAAAAGTC | NC_010446.4 (132532671-132533688) | Exon         | No  |
| <i>DPY19L2</i>      | GTATAGTAGAGTGAAAAGTA | NC_010460.3 (42568459-42569440)   | Intron       | No  |
| <i>UNC13C</i>       | ATATAGTGGAGGGAAAAGCC | NC_010443.4 (130045664-130046680) | Intron       | No  |
| <i>ITSN2</i>        | GTATAGTTGAGGGAAATGTA | NC_010445.3 (121743732-121744717) | Intron       | Yes |
| <i>3' to GNPDA2</i> | ATATAGTCGTGGGAAAAGTT | NC_010450 (35839672-35840689)     | Intron       | No  |
| <i>3' to LPGAT1</i> | GTATAGGCAAGGGAAAAGTA | NC_010451.4 (131421672-131422691) | Intron       | No  |

Supplementary Table 2. Summary of off-targeting comparison for *IL2RG*. Target gene (*IL2RG*) guide sequence compared to potential off-target sequence. Location on chromosome, intron or exon region and presence of PAM site is indicated.

| Gene                          | Sequence                                       | Location on chromosome                | Intron/Exon? | Pam |
|-------------------------------|------------------------------------------------|---------------------------------------|--------------|-----|
| <i>IL2RG</i>                  | GGGACTCTCAACGTTTCCAC                           | NC_010461.5<br>(57143568-57151242)    | Exon         | Yes |
| <i>CCNB3</i>                  | TGA <b>A</b> CTCT <b>G</b> AACGTTTCCAC         | NC_010461.4<br>(48865012-48865996)    | Intron       | No  |
| <i>ZNF189</i>                 | TGA <b>A</b> CTCTCA <b>A</b> CTTTTCCAC         | NC_010443.4<br>(271662850- 271663866) | Intron       | No  |
| <i>MYOM1</i>                  | GGGACTCTCAA <b>A</b> GTTT <b>T</b> AGC         | NC_010448.3<br>(96567814-96568829)    | Intron       | Yes |
| <i>P2RX7</i>                  | GGGACTCTCA <b>A</b> TGTTT <b>C</b> TCC         | NC_010456.4<br>(33314885-33315869)    | Intron       | Yes |
| <i>NTNG1</i>                  | GGGACTCT <b>G</b> AACGTT <b>C</b> CCAC         | NC_010446.4<br>(123215716- 123216697) | Intron       | No  |
| <i>TRPV1</i>                  | <b>A</b> GGACTCTCAA <b>G</b> GTTT <b>C</b> CCA | NC_010454.3<br>(51553951-51554967)    | Intron       | Yes |
| <i>5' to<br/>LOC102157658</i> | GGGACTCT <b>C</b> TACGTT <b>C</b> TG           | NC_010461.5<br>(117490221-117491238)  | Intron       | No  |
| <i>5' to DCBLD2</i>           | GGGACTCTCA <b>A</b> TGTTTCCAC                  | NC_010455.5<br>(160064437-160156205)  | Intron       | No  |

Supplementary Table 3. Summary of off-targeting comparison for *Ig heavy chain*. Target gene (*Ig heavy chain*) guide sequence compared to potential off-target sequence. Location on chromosome, intron or exon region and presence of PAM site is indicated.

| Gene                  | Sequence              | Location on Chromosome                 | Intron/Exon? | Pam |
|-----------------------|-----------------------|----------------------------------------|--------------|-----|
| <i>Ig Heavy Chain</i> | ACACCCCCCAGGTTTTTGTG  | NW_018084979.1<br>(3676148-3841291)    | Exon         | Yes |
| <i>5' to LRRFIP1</i>  | CAACCCCCCAGCTTTTTGTG  | NC_010457<br>(137255672-<br>137256655) | Intron       | Yes |
| <i>EDIL3</i>          | TAACCCCCCTAGGTTTTTGTG | NC_010444 (92541026<br>– 92542043)     | Intron       | No  |
| <i>AR</i>             | TCTCCCCCCAGGTTTTTGTG  | NC_010461.5<br>(53713243- 53714259)    | Intron       | Yes |
| <i>MYLK3</i>          | ACACCCACCAGGTTTTTGTG  | NC_010448.4<br>(37860344- 37861325)    | Intron       | No  |
| <i>RBFOX1</i>         | ACACCTCCCAGGCTTTTTGTG | NC_010445 (34998525-<br>34999544)      | Intron       | Yes |
| <i>CCDC60</i>         | GCACCCCCCTAGGTTTTTGTG | NC_010456 (33512327-<br>33513309)      | Intron       | No  |

Supplementary Table 4. Summary of off-targeting comparison for *SCD5*. Target gene (*SCD5*) guide sequence compared to potential off-target sequence. Location on chromosome, intron or exon region and presence of PAM site is indicated.

| <i>Gene</i>            | <b>Sequence</b>      | <b>Location on Chromosome</b>         | <b>Intron/Exon?</b> | <b>PAM</b> |
|------------------------|----------------------|---------------------------------------|---------------------|------------|
| <i>SCD5</i>            | ACCGCTCTGGGTGTGACAGC | NC_010450.4<br>(135507346-135634031)  | Exon                | Yes        |
| <i>SDK1</i>            | CCTGCTCTGGGTGTGACAGT | NC_010445.3 (3521346-<br>3522331)     | Intron              | No         |
| <i>KLHL29</i>          | AGAGCTCTGGGTGTGGCAGC | NC_010445.3<br>(122252390- 122253406) | Intron              | No         |
| <i>ACLY</i>            | CCAGCTCTGGGAGTGACAGC | NC_010454.3 (21092639-<br>21093655)   | Intron              | Yes        |
| <i>5' to<br/>RAB3A</i> | CCCGCTCTGCGTGTGACAGT | NC_010444.4 (59602517-<br>59603534)   | Intron              | Yes        |

Supplementary Table 5. Summary of off-targeting results for *RAG2*. Five pigs were tested for each potential off-target gene. No off-targeting events were found.

| <i>RAG2</i>             |             |                          |
|-------------------------|-------------|--------------------------|
| Gene                    | Number pigs | Number off-target events |
| <i>SLCO4C1</i>          | 5           | 0                        |
| <i>PLCXD3</i>           | 5           | 0                        |
| <i>FAM174B</i>          | 5           | 0                        |
| <i>DPYD</i>             | 5           | 0                        |
| <i>DPY19L2</i>          | 5           | 0                        |
| <i>UNC13C</i>           | 5           | 0                        |
| <i>ITSN2</i>            | 5           | 0                        |
| <i>3' to<br/>GNPDA2</i> | 5           | 0                        |
| <i>3' to<br/>LPGAT1</i> | 5           | 0                        |

Supplementary Table 6. Summary of off-targeting results for *IL2RG*. Five pigs were tested for each potential off-target gene. No off-targeting events were found.

| <i>IL2RG</i>                  |                    |                                 |
|-------------------------------|--------------------|---------------------------------|
| <b>Gene</b>                   | <b>Number pigs</b> | <b>Number off-target events</b> |
| <i>CCNB3</i>                  | 5                  | 0                               |
| <i>ZNF189</i>                 | 5                  | 0                               |
| <i>MYOM1</i>                  | 5                  | 0                               |
| <i>P2RX7</i>                  | 5                  | 0                               |
| <i>NTNG1</i>                  | 5                  | 0                               |
| <i>TRPV1</i>                  | 5                  | 0                               |
| <i>5' to<br/>LOC102157658</i> | 5                  | 0                               |
| <i>5' to DCBLD2</i>           | 5                  | 0                               |

Supplementary Table 7. Summary of off-targeting results for *SCD5*. Six pigs were tested for each potential off-target gene. No off-targeting events were found.

| <b>SCD5</b>        |                    |                                 |
|--------------------|--------------------|---------------------------------|
| <b>Gene</b>        | <b>Number pigs</b> | <b>Number off-target events</b> |
| <i>SDK1</i>        | 6                  | 0                               |
| <i>KLHL29</i>      | 6                  | 0                               |
| <i>ACLY</i>        | 6                  | 0                               |
| <i>5' to RAB3A</i> | 6                  | 0                               |

Supplementary Table 8. Embryo transfer to generate SCD5 knockout fetuses. Day 5-6 embryos were transferred into surrogates. A total of 6 fetus were obtained from one surrogate.

| Surrogate ID | Number of embryos generated | Number of embryos transferred into a recipient | pregnancy | Number of fetuses |
|--------------|-----------------------------|------------------------------------------------|-----------|-------------------|
| 27-5         | 448                         | 65 (day-6)                                     | Yes       | 6                 |
| 27-2         |                             | 50 (day-5)                                     | No        | -                 |



Supplementary Table 9. Genotype of SCD5 knockout fetuses. No wild-type allele was identified from the fetuses.

| Fetuses | Genotype                                                        |
|---------|-----------------------------------------------------------------|
| 1       | 9 base pair deletion/ 14 base pair deletion                     |
| 2       | 2 base pair change, 1 base pair deletion/ 9 base pair deletion  |
| 3       | 14 base pair deletion/ 3 base pair deletion, 1 base pair change |
| 4       | 4 base pair deletion/ 16 base pair deletion, 3base pair change  |
| 5       | 2 base pair insertion                                           |
| 6       | 9 base pair deletion, 1 base pair change/ 9 base pair deletion  |

Supplementary Table 10. Summary of primers used to amplify genes tested for potential off-targeting sites as well as original *RAG2* target gene.

| <b>Gene</b>         | <b>Forward</b>                     | <b>Reverse</b>               | <b>Expected Size</b> |
|---------------------|------------------------------------|------------------------------|----------------------|
| <i>RAG2</i>         | AAGGATTCCTGCTACCTTCCTCCT           | AGATAGCCCATCTTGAAGTTCTGG     | 426                  |
| <i>SLCO4C1</i>      | GTAAACTGATAGGCATTCTAATCCAGAACTAACC | CTGGCCCATCTCCTCCATTC         | 506                  |
| <i>PLCXD3</i>       | GAGGGCCGAATCAGTACTTGC              | CTCCACAAGACAGGGATGACATC      | 478                  |
| <i>FAM174B</i>      | CAGAGGTTGCAGGACAATGGC              | GCAATGAACATGCGGGTGC          | 369                  |
| <i>DPYD</i>         | CCCTGTGCTTAAACTCCCACATC            | CTAAAGTGACACCGGTTAAGCCC      | 502                  |
| <i>DPY19L2</i>      | GGA GTATCTGAAC TCCACTTTT GGT       | AGA AGT GCA ACC AAG GCC AG   | 496                  |
| <i>UNC13C</i>       | GTGGGTTTTGTGGGAGTGTAGTG            | CCACTGTACTCAAAGAATCCAGATTGAC | 410                  |
| <i>ITSN2</i>        | CAATGAAAGACAGGAAAGACCAGAGGCTG      | GCTACAGCATGATGTTTCCTTGAGAG   | 767                  |
| <i>3' to GNPDA2</i> | CCTGCTCTGTTTCGCCTCAG               | CTTTGTACAGAGGTTGGCTCTTCT     | 575                  |
| <i>3' to LPGAT1</i> | GGGGTCTCTTGGTTTGCTCC               | GCTTGTAGGCCGGCTTCTTCAG       | 463                  |

Supplementary Table 11. Summary of primers used to amplify genes tested for potential off-targeting sites as well as original *IL2RG* target gene.

| <b>Gene</b>                   | <b>Forward</b>               | <b>Reverse</b>               | <b>Expected Size</b> |
|-------------------------------|------------------------------|------------------------------|----------------------|
| <i>IL2RG</i>                  | CTGGACTATTAGAAGGATGTGGGC     | ATATAGTGGGAAGCCTGGGATGCT     | 417                  |
| <i>CCNB3</i>                  | GCCAGATCCACAGGACACTTTG       | GAGGTGACAGCTAAAGGTACAGGG     | 469                  |
| <i>ZNF189</i>                 | GGCTTTTCTTTCTTCTAGTCTCCACTGG | CCTGGCTGTGAAGTGAACAAATAGTAGG | 439                  |
| <i>MYOM1</i>                  | GGTTCCATTCATCTGTCTTTGCTCTC   | GGCTGTGGTATAGGCTGGC          | 452                  |
| <i>P2RX7</i>                  | CTTTGTCACTCTTGCCATCGGG       | CTACCCAACAAACTATCCTGAACCTGG  | 441                  |
| <i>NTNG1</i>                  | GCTGTAATTGGTAAGGCAATGGCTT    | GGCCTCTCCCTGCTTCTC           | 447                  |
| <i>TRPV1</i>                  | GCAGCCTCTGGGTGCTAAG          | CCAGGGTGCTTCGCTTGTC          | 467                  |
| <i>5' to<br/>LOC102157658</i> | GTGTGCAGATTTCTTCTATAACGGC    | GTTTCAACATTAACATCATGGGGTCCC  | 400                  |
| <i>5' to DCBLD2</i>           | CCAGGGTCCCCCTTCCTG           | CATGGGTACTGGAACACAAAAGAGGG   | 466                  |

Supplementary Table 12. Summary of primers used to amplify genes tested for potential off-targeting sites as well as original *Ig heavy chain* target gene.

| <b>Gene</b>           | <b>Forward</b>                   | <b>Reverse</b>                | <b>Expected size</b> |
|-----------------------|----------------------------------|-------------------------------|----------------------|
| <i>Ig heavy chain</i> | GACACTTTGGAGGTCAGGAACGGGAG       | CTTCTCTCTCCGACATGGCTCTTTCAGAC | 848                  |
| <i>5' to LRRF1P1</i>  | GAAGTCACACTCCGCCGGG              | GTGAAGAATCTGGAAGGCCCAAGG      | 390                  |
| <i>EDIL3</i>          | CATCTTCCTATTCTCCAGCAGGGC         | CACATATCACACCTAGAATCTGTGGGAG  | 462                  |
| <i>AR</i>             | CTAGAAGATGGTGAATCCTAGTTCCCATTCTC | GAGTGAAGAGGACACTGATATGCC      | 650                  |
| <i>MYLK3</i>          | CACACTCTTCTGTGGTTACTAATGAGAGCC   | CCCTGAGACGCCAGGTGG            | 392                  |
| <i>RBFOX1</i>         | GCTCTCTCCTCCCTGAGAGG             | CAAAGCCATGCTGCCATCAGGAG       | 401                  |
| <i>CCDC60</i>         | GCTGTCCTTCTCTCAGTCCCAC           | CCTGTGACCTTGGGCAGG            | 400                  |

Supplementary Table 13. Summary of primers used to amplify genes tested for potential off-targeting sites as well as original *SCD5* gene.

| <b>Gene</b>            | <b>Forward</b>         | <b>Reverse</b>           | <b>Expected<br/>Size</b> |
|------------------------|------------------------|--------------------------|--------------------------|
| <i>SCD5</i>            | GCAGGAAACAGTCGCAAAGA   | GGGGTACTGTCAGGGTCAA      | 756                      |
| <i>SDK1</i>            | GCACGTTTTGTAATGGGGCCG  | CCCCCAGTATTTAGCACAGAGCC  | 352                      |
| <i>KLHL29</i>          | GGCGCAGCTGGTGTCAATC    | GATGCTCACTCTCGAGGGCG     | 342                      |
| <i>ACLY</i>            | GGCCAGGGAAAGCAGAGC     | CCAGAATTCTAGACGGGGTGGGAG | 384                      |
| <i>5' to<br/>RAB3A</i> | CGAGAGGAGGGCCGTGACAATC | GGCACTCGGGAGCTCACC       | 467                      |
